# Supplementary material for: Hemodialysis patient characteristics associated with better experience as measured by the In-center Hemodialysis Consumer Assessment of Healthcare Providers and Systems (ICH CAHPS) survey
Source: Springer Nature journal article supplement (doi:10.1186/s12882-018-1147-3), 2018-11-28
Supplement: MOESM1 [file 16301480]

**Supplementary information:**

Table 1: Analyses performed

|                                                | <b>Primary analysis</b>                          | <b>Sensitivity analysis 1</b>                    | <b>Sensitivity analysis 2</b>                    | <b>Sensitivity analysis 3</b>                    |
|------------------------------------------------|--------------------------------------------------|--------------------------------------------------|--------------------------------------------------|--------------------------------------------------|
| <b>Top box definition for global ratings</b>   | 9-10                                             | 9-10                                             | 8-10                                             | 8-10                                             |
| <b>Top box definition for composite scores</b> | Average equal to 4 for NCC and DCO and 1 for PIP | Average equal to 4 for NCC and DCO and 1 for PIP | Average equal to 4 for NCC and DCO and 1 for PIP | Average equal to 4 for NCC and DCO and 1 for PIP |
| <b>Missing covariate data</b>                  | Not included                                     | Multiple imputation performed                    | Not included                                     | Multiple imputation performed                    |
| <b>Incomplete composite responses</b>          | Decreased denominator to obtain average*         | Decreased denominator to obtain average*         | Decreased denominator to obtain average*         | Decreased denominator to obtain average*         |
| <b>&lt;50% key questions answered</b>          | Not included                                     | Not included                                     | Not included                                     | Not included                                     |
| <b>Proxy help indicated</b>                    | Not included                                     | Not included                                     | Not included                                     | Not included                                     |

\*As long as at least 50% of the questions within a composite were answered otherwise individual was not included. 9-10 is the current CMS top box definition and 8-10 was the older AHRQ top box definition. NCC: Nephrologists' Communication and Caring; DCO: Quality of Dialysis Center Care and Operations; PIP: Providing Information to Patients

Table 2: ICH CAHPS questions used for scoring in 2012

| <b>Question</b> | <b>Nephrologists' Communication and Caring (NCC)</b>                                                                                                   |
|-----------------|--------------------------------------------------------------------------------------------------------------------------------------------------------|
| 3               | In the last 3 months, how often did your kidney doctors listen carefully to you?                                                                       |
| 4               | In the last 3 months, how often did your kidney doctors explain things in a way that was easy to understand?                                           |
| 5               | In the last 3 months, how often did your kidney doctors show respect for what you had to say?                                                          |
| 6               | In the last 3 months, how often did your kidney doctors spend enough time with you?                                                                    |
| 7               | In the last 3 months, how often did you feel your kidney doctors really cared about you as a person?                                                   |
| 9               | Do your kidney doctors seem informed and up to date about the health care you receive from other doctors?                                              |
|                 | <b>Quality of Dialysis Center Care and Operations (DCO)</b>                                                                                            |
| 10              | In the last 3 months, how often did the dialysis center staff listen carefully to you?                                                                 |
| 11              | In the last 3 months, how often did the dialysis center staff explain things in a way that was easy to understand?                                     |
| 12              | In the last 3 months, how often did the dialysis center staff show respect for what you had to say?                                                    |
| 13              | In the last 3 months, how often did the dialysis center staff spend enough time with you?                                                              |
| 14              | In the last 3 months, how often did you feel the dialysis center staff really cared about you as a person?                                             |
| 15              | In the last 3 months, how often did the dialysis center staff make you as comfortable as possible during dialysis?                                     |
| 16              | In the last 3 months, did dialysis center staff keep information about you and your health as private as possible from other patients?                 |
| 17              | In the last 3 months, did you feel comfortable asking dialysis center staff everything you wanted about dialysis care?                                 |
| 21              | In the last 3 months, how often did dialysis center staff insert your needles with as little pain as possible?                                         |
| 22              | In the last 3 months, how often did dialysis center staff check you as closely as you wanted while you were on the dialysis machine?                   |
| 24              | In the last 3 months, how often were the dialysis center staff able to manage problems during your dialysis?                                           |
| 25              | In the last 3 months, how often did dialysis center staff behave in a professional manner?                                                             |
| 26              | In the last 3 months, did dialysis center staff talk to you about what you should eat and drink?                                                       |
| 27              | In the last 3 months, how often did dialysis center staff explain blood test results in a way that was easy to understand?                             |
| 33              | In the last 3 months, when you arrived on time, how often did you get put on the dialysis machine within 15 minutes of your appointment or shift time? |
| 34              | In the last 3 months, how often was the dialysis center as clean as it could be?                                                                       |
| 43              | In the last 12 months, how often were you satisfied with the way they handled these problems?                                                          |
|                 | <b>Providing Information to Patients (PIP)</b>                                                                                                         |
| 19              | Do you know how to take care of your graft, fistula, or catheter?                                                                                      |
| 28              | Did this dialysis center ever give you any written information about your rights as a patient?                                                         |

|    |                                                                                                                                                          |
|----|----------------------------------------------------------------------------------------------------------------------------------------------------------|
| 28 | Did dialysis center staff at this center ever review your rights as a patient with you?                                                                  |
| 30 | Have dialysis center staff ever told you what to do if you experience a health problem at home?                                                          |
| 31 | Have any dialysis center staff ever told you how to get off the machine if there is an emergency at the center?                                          |
| 36 | In the last 12 months, did either your kidney doctors or dialysis center staff talk to you as much as you wanted about which treatment is right for you? |
| 38 | In the last 12 months, have either your kidney doctors or dialysis center staff explained to you why you are not eligible for a kidney transplant?       |
| 39 | In the last 12 months, did either your kidney doctors or dialysis center staff talk to you about peritoneal dialysis?                                    |
| 40 | In the last 12 months, were you as involved as much as you wanted in choosing the treatment for kidney disease that is right for you?                    |

Figure 1a: Geographic distribution of DCI clinics

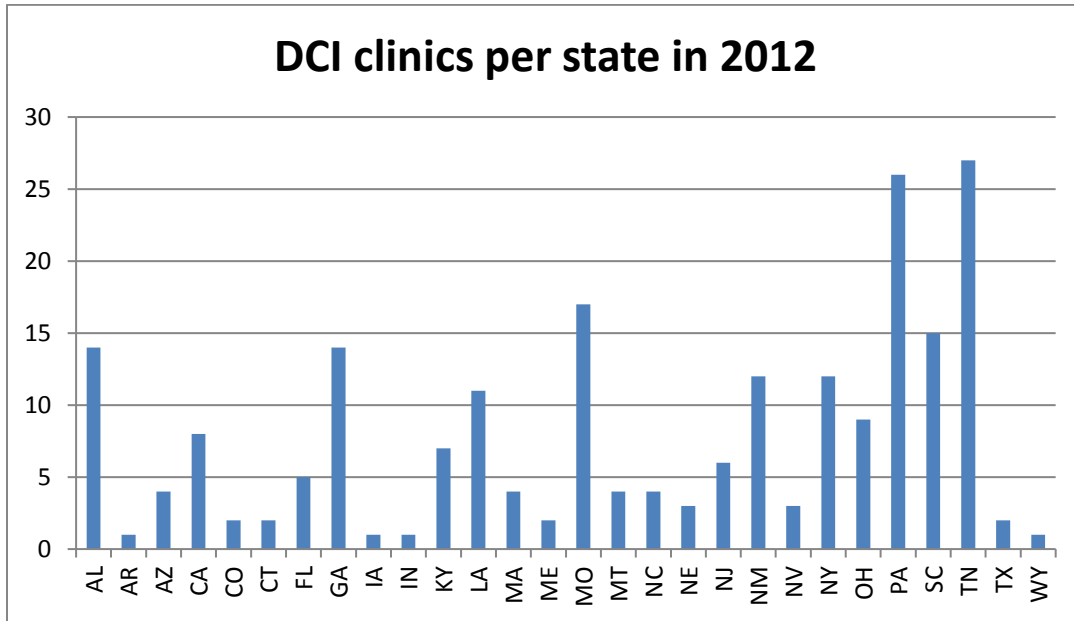

Figure 1b: Geographic distribution of responders

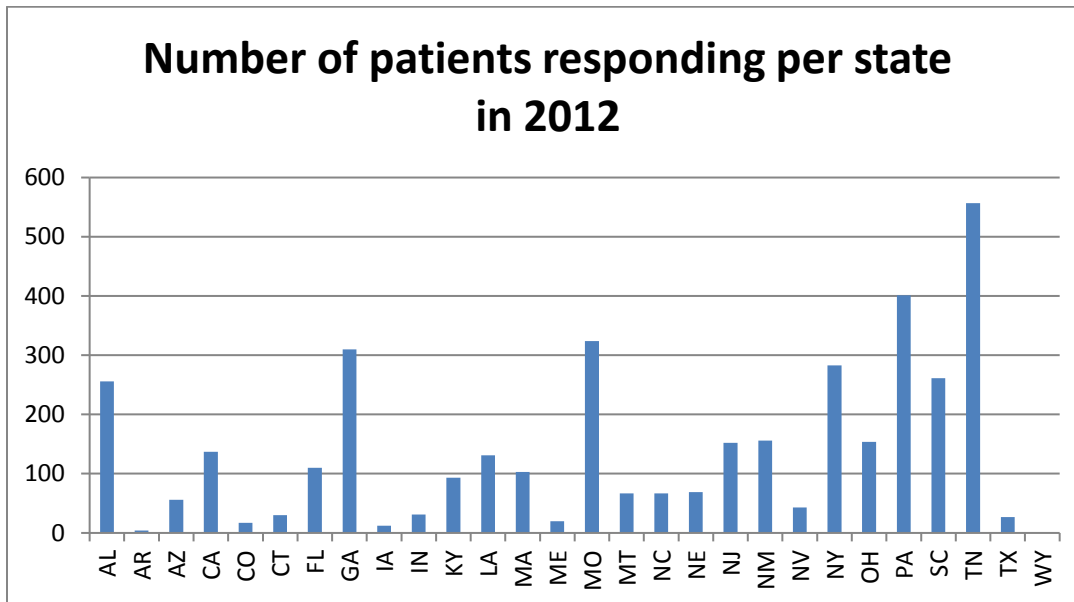

Figure 2: Distribution of scores

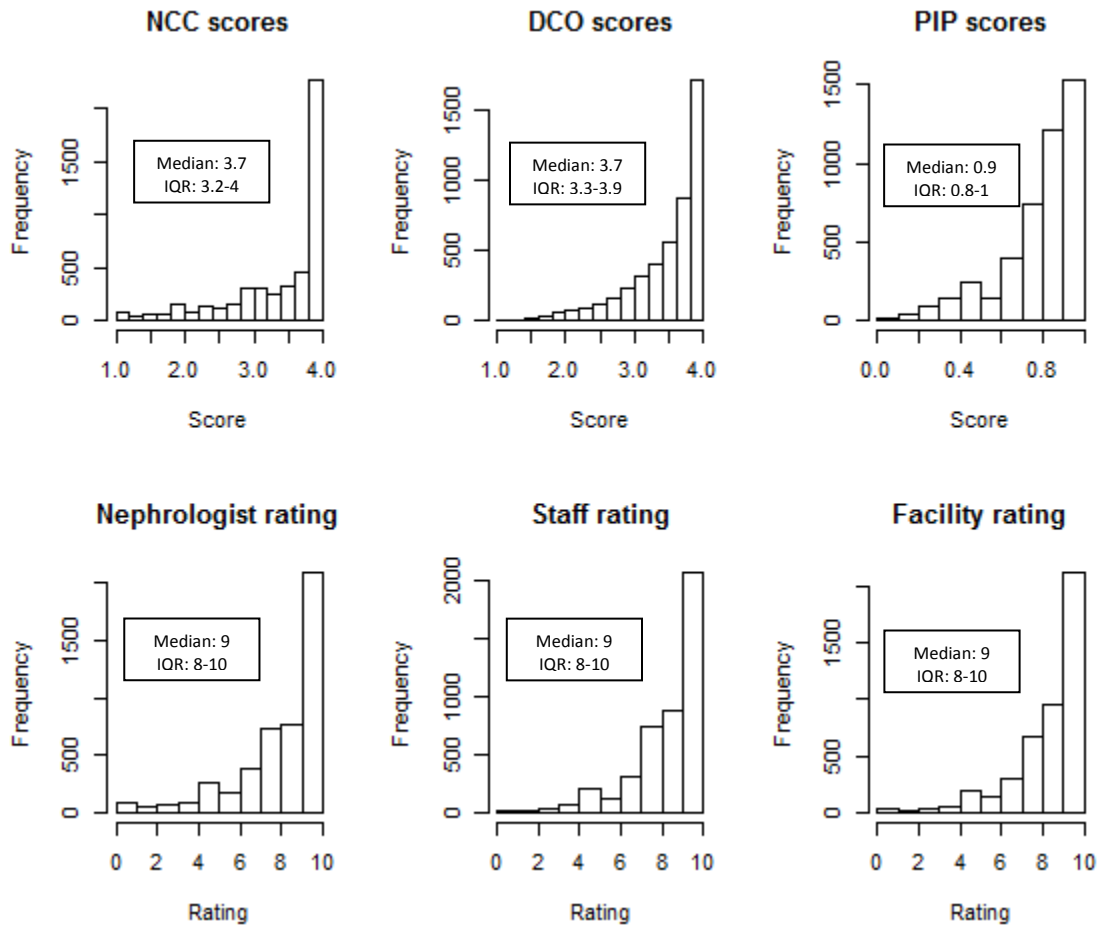

Table 3a: Patient Characteristics stratified by higher or lower nephrologist rating

|                                                  | Total<br>(n=3,294) | Top Box<br>(n=2,045, 62%) | Below Top Box<br>(n=1249, 38%) |
|--------------------------------------------------|--------------------|---------------------------|--------------------------------|
| Age (years)                                      | 61.9 ± 13.9        | 63.0 ± 13.7               | 60.2 ± 13.9                    |
| Female                                           | 1498 (45.5)        | 978 (47.8)                | 520 (41.6)                     |
| Race                                             |                    |                           |                                |
| Black                                            | 1269 (38.5)        | 800 (39.1)                | 469 (37.6)                     |
| White                                            | 1870 (56.8)        | 1161 (56.8)               | 709 (56.8)                     |
| Other                                            | 155 (4.7)          | 84 (4.1)                  | 71 (5.7)                       |
| Hispanic Ethnicity                               | 171 (5.2)          | 103 (5.0)                 | 68 (5.4)                       |
| Cause of ESRD                                    |                    |                           |                                |
| Diabetes                                         | 1322 (40.1)        | 795 (38.9)                | 527 (42.2)                     |
| Hypertension                                     | 939 (28.5)         | 603 (29.5)                | 336 (26.9)                     |
| Other                                            | 1033 (31.4)        | 647 (31.6)                | 386 (30.9)                     |
| Marital status                                   |                    |                           |                                |
| Married                                          | 1437 (43.6)        | 909 (44.5)                | 528 (42.3)                     |
| Divorced/Separated                               | 676 (20.5)         | 409 (20.0)                | 267 (21.4)                     |
| Widowed                                          | 455 (13.8)         | 315 (15.4)                | 140 (11.2)                     |
| Single                                           | 726 (22.0)         | 412 (20.2)                | 314 (25.1)                     |
| Education Level                                  |                    |                           |                                |
| Grade School                                     | 258 (7.8)          | 173 (8.5)                 | 85 (6.8)                       |
| High School                                      | 2039 (61.9)        | 1285 (62.8)               | 754 (60.4)                     |
| College/Post Graduate                            | 997 (30.3)         | 587 (28.7)                | 410 (32.8)                     |
| English speaker                                  | 3254 (98.8)        | 2014 (98.5)               | 1240 (99.3)                    |
| Insurance                                        |                    |                           |                                |
| Medicare/Medicaid                                | 930 (28.2)         | 561 (27.4)                | 369 (29.5)                     |
| Medicare only                                    | 1507 (45.8)        | 953 (46.6)                | 554 (44.4)                     |
| Medicaid only                                    | 148 (4.5)          | 83 (4.1)                  | 65 (5.2)                       |
| Other                                            | 709 (21.5)         | 448 (21.9)                | 261 (20.9)                     |
| Active on transplant waitlist                    | 454 (13.8)         | 294 (14.4)                | 160 (12.8)                     |
| Vascular access                                  |                    |                           |                                |
| Fistula                                          | 2152 (65.3)        | 1336 (65.3)               | 816 (65.3)                     |
| Graft                                            | 456 (13.8)         | 440 (21.5)                | 246 (19.7)                     |
| Catheter                                         | 686 (20.8)         | 269 (13.2)                | 187 (15.0)                     |
| Albumin (g/dL)                                   | 3.9 ± 0.4          | 3.88 ± 0.4                | 3.89 ± 0.4                     |
| Hemoglobin (g/dL)                                | 11.2 ± 1.1         | 11.2 ± 1.1                | 11.3 ± 1.2                     |
| Kt/V                                             | 1.62 ± 0.27        | 1.64 ± 0.27               | 1.60 ± 0.27                    |
| BMI (kg/m <sup>2</sup> )                         | 29.2 ± 7.7         | 29.1 ± 7.5                | 29.3 ± 7.8                     |
| Unexcused absences                               | 463 (14.1)         | 250 (12.2)                | 213 (17.1)                     |
| Treatments shortened                             | 1445 (43.9)        | 811 (39.7)                | 634 (50.8)                     |
| Hospitalization                                  | 331 (10.1)         | 197 (9.6)                 | 134 (10.7)                     |
| ESRD vintage (months)                            | 37.8 (18.2, 72.3)  | 37.1 (17.7, 71.1)         | 39.1 (19.2, 73.7)              |
| ESRD vintage > 12 months before current facility | 695 (21.1)         | 414 (20.2)                | 281 (22.5)                     |

|                     |             |             |             |
|---------------------|-------------|-------------|-------------|
| Ability to ambulate | 2800 (85.0) | 1734 (84.8) | 1066 (85.4) |
| Ability to transfer | 2981 (90.5) | 1843 (90.1) | 1138 (91.1) |
| Falls               | 301 (9.1)   | 176 (8.6)   | 125 (10.0)  |
| ADL score           | 8 (5, 8)    | 8 (5, 8)    | 8 (5, 8)    |
| Response mode       |             |             |             |
| Mail                | 2739 (83.2) | 1690 (82.6) | 1049 (84.0) |
| Telephone           | 555 (16.9)  | 355 (17.4)  | 200 (16.0)  |

Top box score defined as 9-10 on the global rating scale. Data presented as n (%), mean  $\pm$  standard deviation, or median (25<sup>th</sup>, 75<sup>th</sup> percentiles). ESRD: End stage renal disease; BMI: Body mass index; ADL: Activities of daily living; Kt/V: Measure of dialysis adequacy. Unexcused absence was defined as missing an entire HD treatment without rescheduling; shortened treatment was defined as treatments that were at least 15 minutes shorter than prescribed; hospitalization included hospital stays for any reason.

Table 3b: Patient Characteristics stratified by higher or lower dialysis staff rating

|                                                  | Total<br>(n=3,145) | Top Box<br>(n=2,071, 66%) | Below Top Box<br>(n=1,074, 34%) |
|--------------------------------------------------|--------------------|---------------------------|---------------------------------|
| Age (years)                                      | 61.8 ± 13.9        | 62.8 ± 13.6               | 59.8 ± 14.2                     |
| Female                                           | 1433 (45.6)        | 949 (45.8)                | 484 (45.1)                      |
| Race                                             |                    |                           |                                 |
| Black                                            | 1201 (38.2)        | 751 (36.3)                | 450 (41.9)                      |
| White                                            | 1795 (57.1)        | 1226 (59.2)               | 569 (53.0)                      |
| Other                                            | 149 (4.7)          | 94 (4.5)                  | 55 (5.1)                        |
| Hispanic Ethnicity                               | 173 (5.5)          | 108 (5.2)                 | 65 (6.1)                        |
| Cause of ESRD                                    |                    |                           |                                 |
| Diabetes                                         | 1253 (39.8)        | 838 (40.5)                | 415 (38.6)                      |
| Hypertension                                     | 891 (28.3)         | 589 (28.4)                | 302 (28.1)                      |
| Other                                            | 1001 (31.8)        | 644 (31.1)                | 357 (33.2)                      |
| Marital status                                   |                    |                           |                                 |
| Married                                          | 1370 (43.6)        | 921 (44.5)                | 449 (41.8)                      |
| Divorced/Separated                               | 641 (20.4)         | 409 (19.8)                | 232 (21.6)                      |
| Widowed                                          | 427 (13.6)         | 311 (15.0)                | 116 (10.8)                      |
| Single                                           | 707 (22.5)         | 430 (20.8)                | 277 (25.8)                      |
| Education Level                                  |                    |                           |                                 |
| Grade School                                     | 256 (8.1)          | 187 (9.0)                 | 69 (6.4)                        |
| High School                                      | 1946 (61.9)        | 1315 (63.5)               | 631 (58.8)                      |
| College/Post Graduate                            | 943 (30.0)         | 569 (27.5)                | 374 (34.8)                      |
| English speaker                                  | 3103 (98.7)        | 2043 (98.7)               | 1060 (98.7)                     |
| Insurance                                        |                    |                           |                                 |
| Medicare/Medicaid                                | 903 (28.7)         | 568 (27.4)                | 335 (31.2)                      |
| Medicare only                                    | 1424 (45.3)        | 958 (46.3)                | 466 (43.4)                      |
| Medicaid only                                    | 143 (4.6)          | 99 (4.8)                  | 44 (4.1)                        |
| Other                                            | 675 (21.5)         | 446 (21.5)                | 229 (21.3)                      |
| Active on transplant waitlist                    | 434 (13.8)         | 277 (13.4)                | 157 (14.6)                      |
| Vascular access                                  |                    |                           |                                 |
| Fistula                                          | 2064 (65.6)        | 1352 (65.3)               | 712 (66.3)                      |
| Graft                                            | 436 (13.9)         | 449 (21.7)                | 196 (18.3)                      |
| Catheter                                         | 645 (20.5)         | 270 (13.0)                | 166 (15.5)                      |
| Albumin (g/dL)                                   | 3.9 ± 0.4          | 3.9 ± 0.4                 | 3.9 ± 0.4                       |
| Hemoglobin (g/dL)                                | 11.2 ± 1.1         | 11.2 ± 1.1                | 11.2 ± 1.2                      |
| Kt/V                                             | 1.62 ± 0.27        | 1.63 ± 0.26               | 1.61 ± 0.29                     |
| BMI (kg/m <sup>2</sup> )                         | 29.2 ± 7.7         | 29.2 ± 7.6                | 29.1 ± 7.7                      |
| Unexcused absences                               | 454 (14.4)         | 282 (13.6)                | 172 (16.0)                      |
| Treatments shortened                             | 1381 (43.9)        | 853 (41.2)                | 528 (49.2)                      |
| Hospitalization                                  | 313 (10.0)         | 205 (9.9)                 | 108 (10.1)                      |
| ESRD vintage (months)                            | 38.1 (18.4, 72.5)  | 36.9 (17.9, 68.5)         | 40.3 (19.3, 77.5)               |
| ESRD vintage > 12 months before current facility | 670 (21.3)         | 411 (19.9)                | 259 (24.1)                      |



|                     |             |             |            |
|---------------------|-------------|-------------|------------|
| Ability to ambulate | 2681 (85.3) | 1760 (85.0) | 921 (85.8) |
| Ability to transfer | 2853 (90.7) | 1882 (90.9) | 971 (90.4) |
| Falls               | 284 (9.0)   | 187 (9.0)   | 97 (9.0)   |
| ADL score           | 8 (5, 8)    | 6.5 ± 2.1   | 6.5 ± 2.1  |
| Response mode       |             |             |            |
| Mail                | 2589 (82.3) | 1686 (81.4) | 903 (84.1) |
| Telephone           | 556 (17.7)  | 385 (18.6)  | 171 (15.9) |

Top box score defined as 9-10 on the global rating scale. Data presented as n (%), mean ± standard deviation, or median (25<sup>th</sup>, 75<sup>th</sup> percentiles). ESRD: End stage renal disease; BMI: Body mass index; ADL: Activities of daily living; Kt/V: Measure of dialysis adequacy. Unexcused absence was defined as missing an entire HD treatment without rescheduling; shortened treatment was defined as treatments that were at least 15 minutes shorter than prescribed; hospitalization included hospital stays for any reason.

Table 3c: Patient Characteristics stratified by higher or lower dialysis facility rating

|                                                  | Total<br>(n=3,153) | Top Box<br>(n=2,157, 68%) | Below Top Box<br>(n=996, 32%) |
|--------------------------------------------------|--------------------|---------------------------|-------------------------------|
| Age (years)                                      | 61.8 ± 13.9        | 62.9 ± 13.5               | 59.4 ± 14.2                   |
| Female                                           | 1432 (45.4)        | 983 (45.6)                | 449 (45.1)                    |
| Race                                             |                    |                           |                               |
| Black                                            | 1200 (38.1)        | 787 (36.5)                | 413 (41.5)                    |
| White                                            | 1804 (57.2)        | 1268 (58.8)               | 536 (53.8)                    |
| Other                                            | 149 (4.7)          | 102 (4.7)                 | 47 (4.7)                      |
| Hispanic Ethnicity                               | 174 (5.5)          | 121 (5.6)                 | 53 (5.3)                      |
| Cause of ESRD                                    |                    |                           |                               |
| Diabetes                                         | 1252 (39.7)        | 875 (40.6)                | 377 (37.9)                    |
| Hypertension                                     | 897 (28.5)         | 613 (28.4)                | 284 (28.5)                    |
| Other                                            | 1004 (31.8)        | 669 (31.0)                | 335 (33.6)                    |
| Marital status                                   |                    |                           |                               |
| Married                                          | 1376 (43.6)        | 968 (44.9)                | 408 (41.0)                    |
| Divorced/Separated                               | 644 (20.4)         | 432 (20.0)                | 212 (21.3)                    |
| Widowed                                          | 428 (13.6)         | 322 (14.9)                | 106 (10.6)                    |
| Single                                           | 705 (22.4)         | 435 (20.2)                | 270 (27.1)                    |
| Education Level                                  |                    |                           |                               |
| Grade School                                     | 258 (8.2)          | 203 (9.4)                 | 55 (5.5)                      |
| High School                                      | 1949 (61.8)        | 1360 (63.1)               | 589 (59.1)                    |
| College/Post Graduate                            | 946 (30.0)         | 594 (27.5)                | 352 (35.3)                    |
| English speaker                                  | 3110 (98.6)        | 2119 (98.2)               | 991 (99.5)                    |
| Insurance                                        |                    |                           |                               |
| Medicare/Medicaid                                | 907 (28.8)         | 596 (27.6)                | 311 (31.2)                    |
| Medicare only                                    | 1426 (45.2)        | 1002 (46.5)               | 424 (42.6)                    |
| Medicaid only                                    | 142 (4.5)          | 94 (4.4)                  | 48 (4.8)                      |
| Other                                            | 678 (21.5)         | 465 (21.6)                | 213 (21.4)                    |
| Active on transplant waitlist                    | 435 (13.8)         | 282 (13.1)                | 153 (15.4)                    |
| Vascular access                                  |                    |                           |                               |
| Fistula                                          | 2070 (65.7)        | 1396 (64.7)               | 674 (67.7)                    |
| Graft                                            | 434 (13.8)         | 460 (21.3)                | 189 (19.0)                    |
| Catheter                                         | 649 (20.6)         | 301 (14.0)                | 133 (13.4)                    |
| Albumin (g/dL)                                   | 3.9 ± 0.4          | 3.9 ± 0.4                 | 3.9 ± 0.4                     |
| Hemoglobin (g/dL)                                | 11.2 ± 1.2         | 11.2 ± 1.1                | 11.2 ± 1.2                    |
| Kt/V                                             | 1.62 ± 0.27        | 1.63 ± 0.26               | 1.62 ± 0.29                   |
| BMI (kg/m <sup>2</sup> )                         | 29.2 ± 7.7         | 29.2 ± 7.7                | 29.1 ± 7.6                    |
| Unexcused absences                               | 455 (14.4)         | 288 (13.4)                | 167 (16.8)                    |
| Treatments shortened                             | 1383 (43.9)        | 891 (41.3)                | 492 (49.4)                    |
| Hospitalization                                  | 315 (10.0)         | 209 (9.7)                 | 106 (10.6)                    |
| ESRD vintage (months)                            | 38.0 (18.3, 72.4)  | 36.4 (17.5, 68.5)         | 41.4 (21.8, 77.4)             |
| ESRD vintage > 12 months before current facility | 671 (21.3)         | 424 (19.7)                | 247 (24.8)                    |

|                     |             |             |            |
|---------------------|-------------|-------------|------------|
| Ability to ambulate | 2690 (85.3) | 1831 (84.9) | 859 (86.2) |
| Ability to transfer | 2862 (90.8) | 1954 (90.6) | 908 (91.2) |
| Falls               | 287 (9.1)   | 203 (9.4)   | 84 (8.4)   |
| ADL score           | 8 (5, 8)    | 6.4 ± 2.1   | 6.6 ± 2.0  |
| Response mode       |             |             |            |
| Mail                | 2592 (82.2) | 1742 (80.8) | 850 (85.3) |
| Telephone           | 561 (17.8)  | 415 (19.2)  | 146 (14.7) |

Top box score defined as 9-10 on the global rating scale. Data presented as n (%), mean ± standard deviation, or median (25<sup>th</sup>, 75<sup>th</sup> percentiles). ESRD: End stage renal disease; BMI: Body mass index; ADL: Activities of daily living; Kt/V: Measure of dialysis adequacy. Unexcused absence was defined as missing an entire HD treatment without rescheduling; shortened treatment was defined as treatments that were at least 15 minutes shorter than prescribed; hospitalization included hospital stays for any reason.

Table 3d: Patient Characteristics stratified by higher or lower Nephrologists' Communication and Caring (NCC) score

|                               | Total<br>(n=3,357) | Top Box<br>(n=1,255, 37%) | Below Top Box<br>(n=2,102, 63%) |
|-------------------------------|--------------------|---------------------------|---------------------------------|
| Age (years)                   | 62.1 ± 13.9        | 62.6 ± 13.3               | 61.8 ± 14.2                     |
| Female                        | 1543 (46.0)        | 616 (49.1)                | 927 (44.1)                      |
| Race                          |                    |                           |                                 |
| Black                         | 1292 (38.5)        | 498 (39.7)                | 794 (37.8)                      |
| White                         | 1909 (56.9)        | 707 (56.3)                | 1202 (57.2)                     |
| Other                         | 156 (4.7)          | 50 (4.0)                  | 106 (5.0)                       |
| Hispanic Ethnicity            | 176 (5.2)          | 59 (4.7)                  | 117 (5.6)                       |
| Cause of ESRD                 |                    |                           |                                 |
| Diabetes                      | 1349 (40.2)        | 492 (39.2)                | 857 (40.8)                      |
| Hypertension                  | 958 (28.5)         | 356 (28.4)                | 602 (28.6)                      |
| Other                         | 1050 (31.3)        | 407 (32.4)                | 643 (30.6)                      |
| Marital status                |                    |                           |                                 |
| Married                       | 1463 (43.6)        | 565 (45.0)                | 898 (42.7)                      |
| Divorced/Separated            | 691 (20.6)         | 259 (20.6)                | 432 (20.6)                      |
| Widowed                       | 472 (14.1)         | 182 (14.5)                | 290 (13.8)                      |
| Single                        | 731 (21.8)         | 249 (19.8)                | 482 (22.9)                      |
| Education Level               |                    |                           |                                 |
| Grade School                  | 269 (8.0)          | 103 (8.2)                 | 166 (7.9)                       |
| High School                   | 2077 (61.9)        | 790 (63.0)                | 1287 (61.2)                     |
| College/Post Graduate         | 1011 (30.1)        | 362 (28.8)                | 649 (30.9)                      |
| English speaker               | 3314 (98.7)        | 1242 (99.0)               | 2072 (98.6)                     |
| Insurance                     |                    |                           |                                 |
| Medicare/Medicaid             | 955 (28.5)         | 357 (28.5)                | 598 (28.5)                      |
| Medicare only                 | 1527 (45.5)        | 574 (45.7)                | 953 (45.3)                      |
| Medicaid only                 | 152 (4.5)          | 50 (4.0)                  | 102 (4.9)                       |
| Other                         | 723 (21.5)         | 274 (21.8)                | 449 (21.4)                      |
| Active on transplant waitlist | 456 (13.6)         | 192 (15.3)                | 264 (12.6)                      |
| Vascular access               |                    |                           |                                 |
| Fistula                       | 2190 (65.2)        | 825 (65.7)                | 1365 (64.9)                     |
| Graft                         | 465 (13.9)         | 161 (12.8)                | 304 (14.5)                      |
| Catheter                      | 702 (20.9)         | 269 (21.4)                | 433 (20.6)                      |
| Albumin (g/dL)                | 3.9 ± 0.4          | 3.9 ± 0.3                 | 3.9 ± 0.4                       |
| Hemoglobin (g/dL)             | 11.2 ± 1.1         | 11.2 ± 1.1                | 11.2 ± 1.1                      |
| Kt/V                          | 1.63 ± 0.27        | 1.65 ± 0.27               | 1.61 ± 0.27                     |
| BMI (kg/m <sup>2</sup> )      | 29.2 ± 7.7         | 29.0 ± 7.3                | 29.3 ± 7.8                      |
| Unexcused absences            | 475 (14.2)         | 163 (13.0)                | 312 (14.8)                      |
| Treatments shortened          | 1473 (43.9)        | 489 (39.0)                | 984 (46.8)                      |
| Hospitalization               | 335 (10.0)         | 124 (9.9)                 | 211 (10.0)                      |
| ESRD vintage (months)         | 37.6 (18.2, 72.1)  | 39.2 (18.0, 73.9)         | 37.3 (18.3, 70.7)               |

|                                                  |             |             |             |
|--------------------------------------------------|-------------|-------------|-------------|
| ESRD vintage > 12 months before current facility | 709 (21.1)  | 282 (22.5)  | 427 (20.3)  |
| Ability to ambulate                              | 2848 (84.8) | 1064 (84.8) | 1784 (84.9) |
| Ability to transfer                              | 3037 (90.5) | 1147 (91.4) | 1890 (89.9) |
| Falls                                            | 310 (9.2)   | 96 (7.7)    | 214 (10.2)  |
| ADL score                                        | 8 (5, 8)    | 8 (5, 8)    | 8 (5, 8)    |
| Response mode                                    |             |             |             |
| Mail                                             | 2795 (83.3) | 1762 (83.8) | 1033 (82.3) |
| Telephone                                        | 562 (16.7)  | 340 (16.2)  | 222 (17.7)  |

Data presented as n (%), mean  $\pm$  standard deviation, or median (25<sup>th</sup>, 75<sup>th</sup> percentiles). ESRD: End stage renal disease; BMI: Body mass index; ADL: Activities of daily living; Kt/V: Measure of dialysis adequacy. Unexcused absence was defined as missing an entire HD treatment without rescheduling; shortened treatment was defined as treatments that were at least 15 minutes shorter than prescribed; hospitalization included hospital stays for any reason.

Table 3e: Patient Characteristics stratified by higher or lower Quality of Dialysis Center Care and Operations (DCO) score

|                               | Total<br>(n=3,238) | Top Box<br>(n=508, 16%) | Below Top Box<br>(n=2,730, 84%) |
|-------------------------------|--------------------|-------------------------|---------------------------------|
| Age (years)                   | 61.9 ± 13.9        | 64.4 ± 13.5             | 61.4 ± 13.9                     |
| Female                        | 1480 (45.7)        | 221 (43.5)              | 1259 (46.1)                     |
| Race                          |                    |                         |                                 |
| Black                         | 1237 (38.2)        | 169 (33.3)              | 1068 (39.1)                     |
| White                         | 1847 (57.0)        | 322 (63.4)              | 1525 (55.9)                     |
| Other                         | 154 (4.8)          | 17 (3.4)                | 137 (5.0)                       |
| Hispanic Ethnicity            | 175 (5.4)          | 31 (6.1)                | 144 (5.3)                       |
| Cause of ESRD                 |                    |                         |                                 |
| Diabetes                      | 1295 (40.0)        | 199 (39.2)              | 1096 (40.2)                     |
| Hypertension                  | 919 (28.4)         | 152 (29.9)              | 767 (28.1)                      |
| Other                         | 1024 (31.6)        | 157 (30.9)              | 867 (31.8)                      |
| Marital status                |                    |                         |                                 |
| Married                       | 1407 (43.5)        | 242 (47.6)              | 1165 (42.7)                     |
| Divorced/Separated            | 662 (20.4)         | 93 (18.3)               | 569 (20.8)                      |
| Widowed                       | 448 (13.8)         | 80 (15.8)               | 368 (13.5)                      |
| Single                        | 721 (22.3)         | 93 (18.3)               | 628 (23.0)                      |
| Education Level               |                    |                         |                                 |
| Grade School                  | 265 (8.2)          | 55 (10.8)               | 210 (7.7)                       |
| High School                   | 2001 (61.8)        | 330 (65.0)              | 1671 (61.2)                     |
| College/Post Graduate         | 972 (30.0)         | 123 (24.2)              | 849 (31.1)                      |
| English speaker               | 3195 (98.7)        | 501 (98.6)              | 2694 (98.7)                     |
| Insurance                     |                    |                         |                                 |
| Medicare/Medicaid             | 931 (28.8)         | 134 (26.4)              | 797 (29.2)                      |
| Medicare only                 | 1465 (45.2)        | 231 (45.5)              | 1234 (45.2)                     |
| Medicaid only                 | 148 (4.6)          | 23 (4.5)                | 125 (4.6)                       |
| Other                         | 694 (21.4)         | 120 (23.6)              | 574 (21.0)                      |
| Active on transplant waitlist | 446 (13.8)         | 49 (9.7)                | 397 (14.5)                      |
| Vascular access               |                    |                         |                                 |
| Fistula                       | 2117 (65.4)        | 325 (64.0)              | 1792 (65.6)                     |
| Graft                         | 451 (13.9)         | 86 (16.9)               | 365 (13.4)                      |
| Catheter                      | 670 (20.7)         | 97 (19.1)               | 573 (21.0)                      |
| Albumin (g/dL)                | 3.9 ± 0.4          | 3.9 ± 0.3               | 3.9 ± 0.4                       |
| Hemoglobin (g/dL)             | 11.2 ± 1.2         | 11.2 ± 1.0              | 11.2 ± 1.2                      |
| Kt/V                          | 1.62 ± 0.27        | 1.64 ± 0.27             | 1.62 ± 0.27                     |
| BMI (kg/m <sup>2</sup> )      | 29.2 ± 7.7         | 28.4 ± 6.8              | 29.3 ± 7.8                      |
| Unexcused absences            | 464 (14.3)         | 54 (10.6)               | 410 (15.0)                      |
| Treatments shortened          | 1425 (44.0)        | 199 (39.2)              | 1226 (44.9)                     |
| Hospitalization               | 320 (9.9)          | 42 (8.3)                | 278 (10.2)                      |
| ESRD vintage (months)         | 38.1 (18.4, 72.4)  | 31.0 (15.1, 61.7)       | 39.5 (19.1, 74.3)               |

|                                                  |             |             |             |
|--------------------------------------------------|-------------|-------------|-------------|
| ESRD vintage > 12 months before current facility | 689 (21.3)  | 78 (15.4)   | 611 (22.4)  |
| Ability to ambulate                              | 2756 (85.1) | 427 (84.1)  | 2329 (85.3) |
| Ability to transfer                              | 2933 (90.6) | 463 (91.1)  | 2470 (90.5) |
| Falls                                            | 293 (9.1)   | 47 (9.3)    | 246 (9.0)   |
| ADL score                                        | 8 (5, 8)    | 8 (5, 8)    | 8 (5, 8)    |
| Response mode                                    |             |             |             |
| Mail                                             | 2669 (82.4) | 2290 (83.9) | 379 (74.6)  |
| Telephone                                        | 569 (17.6)  | 440 (16.1)  | 129 (25.4)  |

Data presented as n (%), mean  $\pm$  standard deviation, or median (25<sup>th</sup>, 75<sup>th</sup> percentiles). ESRD: End stage renal disease; BMI: Body mass index; ADL: Activities of daily living; Kt/V: Measure of dialysis adequacy. Unexcused absence was defined as missing an entire HD treatment without rescheduling; shortened treatment was defined as treatments that were at least 15 minutes shorter than prescribed; hospitalization included hospital stays for any reason.

Table 3f: Patient Characteristics stratified by higher or lower Providing Information to Patients (PIP) score

|                               | Total<br>(n=3,185) | Top Box<br>(n=1,098, 34%) | Below Top Box<br>(n=2,087, 66%) |
|-------------------------------|--------------------|---------------------------|---------------------------------|
| Age (years)                   | 61.8 ± 13.8        | 59.1 ± 13.5               | 63.3 ± 13.8                     |
| Female                        | 1454 (45.7)        | 491 (44.7)                | 963 (46.1)                      |
| Race                          |                    |                           |                                 |
| Black                         | 1215 (38.2)        | 420 (38.3)                | 795 (38.1)                      |
| White                         | 1818 (57.1)        | 619 (56.4)                | 1199 (57.5)                     |
| Other                         | 152 (4.8)          | 59 (5.4)                  | 93 (4.5)                        |
| Hispanic Ethnicity            | 173 (5.4)          | 59 (5.4)                  | 114 (5.5)                       |
| Cause of ESRD                 |                    |                           |                                 |
| Diabetes                      | 1270 (39.9)        | 439 (40.0)                | 831 (39.8)                      |
| Hypertension                  | 902 (28.3)         | 313 (28.5)                | 589 (28.2)                      |
| Other                         | 1013 (31.8)        | 346 (31.5)                | 667 (32.0)                      |
| Marital status                |                    |                           |                                 |
| Married                       | 1382 (43.4)        | 481 (43.8)                | 901 (43.2)                      |
| Divorced/Separated            | 650 (20.4)         | 214 (19.5)                | 436 (20.9)                      |
| Widowed                       | 443 (13.9)         | 134 (12.2)                | 309 (14.8)                      |
| Single                        | 710 (22.3)         | 269 (24.5)                | 441 (21.1)                      |
| Education Level               |                    |                           |                                 |
| Grade School                  | 261 (8.2)          | 91 (8.3)                  | 170 (8.2)                       |
| High School                   | 1965 (61.7)        | 695 (63.3)                | 1270 (60.9)                     |
| College/Post Graduate         | 959 (30.1)         | 312 (28.4)                | 647 (31.0)                      |
| English speaker               | 3142 (98.7)        | 1085 (98.8)               | 2057 (98.6)                     |
| Insurance                     |                    |                           |                                 |
| Medicare/Medicaid             | 921 (28.9)         | 583 (27.9)                | 338 (30.8)                      |
| Medicare only                 | 1436 (45.1)        | 953 (45.7)                | 483 (44.0)                      |
| Medicaid only                 | 148 (4.7)          | 95 (4.6)                  | 53 (4.8)                        |
| Other                         | 680 (21.4)         | 456 (21.9)                | 224 (20.4)                      |
| Active on transplant waitlist | 439 (13.8)         | 191 (17.4)                | 248 (11.9)                      |
| Vascular access               |                    |                           |                                 |
| Fistula                       | 2084 (65.4)        | 712 (64.9)                | 1372 (65.7)                     |
| Graft                         | 444 (13.9)         | 144 (13.1)                | 300 (14.4)                      |
| Catheter                      | 657 (20.6)         | 242 (22.0)                | 415 (19.9)                      |
| Albumin (g/dL)                | 3.9 ± 0.4          | 3.9 ± 0.4                 | 3.9 ± 0.4                       |
| Hemoglobin (g/dL)             | 11.2 ± 1.2         | 11.2 ± 1.1                | 11.2 ± 1.2                      |
| Kt/V                          | 1.62 ± 0.27        | 1.61 ± 0.27               | 1.63 ± 0.27                     |
| BMI (kg/m <sup>2</sup> )      | 29.2 ± 7.7         | 29.7 ± 7.7                | 28.9 ± 7.6                      |
| Unexcused absences            | 463 (14.5)         | 155 (14.1)                | 308 (14.8)                      |
| Treatments shortened          | 1397 (43.9)        | 472 (43.0)                | 925 (44.3)                      |
| Hospitalization               | 315 (9.9)          | 108 (9.8)                 | 207 (9.9)                       |
| ESRD vintage (months)         | 38.1 (18.4, 72.5)  | 37.8 (18.1, 71.3)         | 38.2 (18.5, 73.2)               |



|                                                  |             |             |             |
|--------------------------------------------------|-------------|-------------|-------------|
| ESRD vintage > 12 months before current facility | 682 (21.4)  | 225 (20.5)  | 457 (21.9)  |
| Ability to ambulate                              | 2711 (85.1) | 970 (88.3)  | 1741 (83.4) |
| Ability to transfer                              | 2888 (90.7) | 1029 (93.7) | 1859 (89.1) |
| Falls                                            | 290 (9.1)   | 94 (8.6)    | 196 (9.4)   |
| ADL score                                        | 8 (5, 8)    | 8 (5, 8)    | 8 (5, 8)    |
| Response mode                                    |             |             |             |
| Mail                                             | 2618 (82.2) | 1752 (84.0) | 866 (78.9)  |
| Telephone                                        | 567 (17.8)  | 335 (16.1)  | 232 (21.1)  |

Data presented as n (%), mean  $\pm$  standard deviation, or median (25<sup>th</sup>, 75<sup>th</sup> percentiles). ESRD: End stage renal disease; BMI: Body mass index; ADL: Activities of daily living; Kt/V: Measure of dialysis adequacy. Unexcused absence was defined as missing an entire HD treatment without rescheduling; shortened treatment was defined as treatments that were at least 15 minutes shorter than prescribed; hospitalization included hospital stays for any reason.

Table 4a: Multivariable association of characteristics with higher nephrologist rating with multiple imputation

|                                                  | Model 1                  | Model 2                  |
|--------------------------------------------------|--------------------------|--------------------------|
| Age, per 5 years                                 | <b>1.07 (1.03, 1.11)</b> | <b>1.07 (1.03, 1.11)</b> |
| Female                                           | 1.03 (0.88, 1.21)        | 0.98 (0.82, 1.17)        |
| Race, black vs white                             | 1.07 (0.89, 1.30)        | 1.05 (0.86, 1.29)        |
| Race, other vs white                             | 0.71 (0.48, 1.05)        | 0.71 (0.48, 1.05)        |
| Ethnicity, Hispanic vs non-Hispanic              | 1.51 (1.00, 2.29)        | 1.42 (0.94, 2.16)        |
| Insurance, Medicare/Medicaid vs Medicare only    | 1.06 (0.85, 1.31)        | 1.07 (0.86, 1.33)        |
| Insurance, Medicaid only vs Medicare only        | 1.03 (0.68, 1.56)        | 1.11 (0.73, 1.69)        |
| Insurance, Other vs Medicare only                | 1.00 (0.81, 1.24)        | 1.02 (0.82, 1.27)        |
| Marital status, married vs single                | 0.94 (0.74, 1.19)        | 0.94 (0.74, 1.19)        |
| Marital status, divorced/separated vs single     | 0.90 (0.70, 1.15)        | 0.94 (0.73, 1.20)        |
| Marital status, widowed vs single                | 1.16 (0.83, 1.62)        | 1.18 (0.85, 1.65)        |
| Education level, grade school vs college or more | 1.17 (0.83, 1.65)        | 1.11 (0.78, 1.57)        |
| Education level, high school vs college or more  | 1.03 (0.87, 1.24)        | 1.02 (0.85, 1.22)        |
| English speaker                                  | 0.81 (0.38, 1.71)        | 0.87 (0.41, 1.85)        |
| Hospitalization                                  |                          | 0.90 (0.69, 1.19)        |
| Active on transplant waitlist                    |                          | 1.19 (0.93, 1.52)        |
| BMI, per 2 kg/m <sup>2</sup>                     |                          | 1.02 (1.00, 1.04)        |
| Cause ESRD, diabetes vs. other                   |                          | 0.90 (0.74, 1.10)        |
| Cause ESRD, hypertension vs. other               |                          | 0.95 (0.77, 1.19)        |
| Vascular access, catheter vs. fistula            |                          | 0.95 (0.75, 1.21)        |
| Vascular access, graft vs. fistula               |                          | 1.05 (0.85, 1.30)        |
| Hemoglobin, per 0.5 g/dL                         |                          | <b>0.95 (0.92, 0.98)</b> |
| Albumin, per 0.2 g/dL                            |                          | 1.00 (0.96, 1.05)        |
| Kt/V, per 0.2                                    |                          | 1.02 (0.95, 1.09)        |
| ESRD vintage, per 12 months                      |                          | 1.02 (0.99, 1.05)        |
| ESRD vintage > 12 months before current facility |                          | 0.88 (0.70, 1.11)        |
| Unexcused absences                               |                          | 0.83 (0.66, 1.04)        |
| Treatments shortened                             |                          | <b>0.70 (0.59, 0.83)</b> |
| Telephone administration vs mail                 |                          | <b>1.56 (1.24, 1.98)</b> |

Data shown as odds ratio (OR) (95% CI). Odds ratio above 1.00 is associated with top box response. Associations with p<0.01 are in bold. ESRD: End stage renal disease; BMI: Body mass index; ADL: Activities of daily living; Kt/V: Measure of dialysis adequacy. Unexcused absence was defined as missing an entire HD treatment without rescheduling; shortened treatment was defined as treatments that were at least 15 minutes shorter than prescribed; hospitalization included hospital stays for any reason.

Table 4b: Multivariable association of characteristics with higher dialysis staff rating with multiple imputation

|                                                  | Model 1                  | Model 2                  |
|--------------------------------------------------|--------------------------|--------------------------|
| Age, per 5 years                                 | <b>1.10 (1.06, 1.15)</b> | <b>1.09 (1.04, 1.13)</b> |
| Female                                           | 0.87 (0.72, 1.04)        | 0.82 (0.67, 1.00)        |
| Race, black vs white                             | 0.88 (0.71, 1.08)        | 0.87 (0.70, 1.09)        |
| Race, other vs white                             | 0.74 (0.47, 1.14)        | 0.73 (0.47, 1.14)        |
| Ethnicity, Hispanic vs non-Hispanic              | 1.21 (0.77, 1.90)        | 1.11 (0.70, 1.74)        |
| Insurance, Medicare/Medicaid vs Medicare only    | 0.93 (0.73, 1.17)        | 0.92 (0.72, 1.17)        |
| Insurance, Medicaid only vs Medicare only        | 1.51 (0.94, 2.44)        | 1.56 (0.96, 2.53)        |
| Insurance, Other vs Medicare only                | 1.01 (0.79, 1.29)        | 0.96 (0.74, 1.23)        |
| Marital status, married vs single                | 1.07 (0.83, 1.39)        | 1.07 (0.82, 1.39)        |
| Marital status, divorced/separated vs single     | 0.94 (0.72, 1.23)        | 0.97 (0.74, 1.27)        |
| Marital status, widowed vs single                | 1.41 (0.97, 2.04)        | 1.42 (0.97, 2.06)        |
| Education level, grade school vs college or more | 1.22 (0.83, 1.79)        | 1.10 (0.75, 1.63)        |
| Education level, high school vs college or more  | 1.16 (0.95, 1.42)        | 1.13 (0.92, 1.39)        |
| English speaker                                  | 0.96 (0.46, 2.02)        | 1.02 (0.49, 2.14)        |
| Hospitalization                                  |                          | 1.06 (0.76, 1.46)        |
| Active on transplant waitlist                    |                          | 1.09 (0.83, 1.44)        |
| BMI, per 2 kg/m <sup>2</sup>                     |                          | 1.01 (0.98, 1.03)        |
| Cause ESRD, diabetes vs. other                   |                          | 1.02 (0.81, 1.28)        |
| Cause ESRD, hypertension vs. other               |                          | 1.06 (0.83, 1.35)        |
| Vascular access, catheter vs. fistula            |                          | 0.90 (0.68, 1.18)        |
| Vascular access, graft vs. fistula               |                          | 1.13 (0.89, 1.43)        |
| Hemoglobin, per 0.5 g/dL                         |                          | 0.98 (0.94, 1.02)        |
| Albumin, per 0.2 g/dL                            |                          | 0.96 (0.91, 1.01)        |
| Kt/V, per 0.2                                    |                          | 1.05 (0.97, 1.13)        |
| ESRD vintage, per 12 months                      |                          | 0.98 (0.94, 1.01)        |
| ESRD vintage > 12 months before current facility |                          | 0.92 (0.72, 1.19)        |
| Unexcused absences                               |                          | 0.87 (0.68, 1.12)        |
| Treatments shortened                             |                          | <b>0.76 (0.63, 0.92)</b> |
| Telephone administration vs mail                 |                          | <b>1.72 (1.32, 2.23)</b> |

Data shown as odds ratio (OR) (95% CI). Odds ratio above 1.00 is associated with top box response. Associations with p<0.01 are in bold. ESRD: End stage renal disease; BMI: Body mass index; ADL: Activities of daily living; Kt/V: Measure of dialysis adequacy. Unexcused absence was defined as missing an entire HD treatment without rescheduling; shortened treatment was defined as treatments that were at least 15 minutes shorter than prescribed; hospitalization included hospital stays for any reason.

Table 4c: Multivariable association of characteristics with higher dialysis facility rating with multiple imputation

|                                                  | Model 1                  | Model 2                  |
|--------------------------------------------------|--------------------------|--------------------------|
| Age, per 5 years                                 | <b>1.12 (1.08, 1.16)</b> | <b>1.10 (1.05, 1.15)</b> |
| Female                                           | 0.91 (0.76, 1.09)        | 0.82 (0.67, 1.00)        |
| Race, black vs white                             | 0.85 (0.69, 1.05)        | 0.84 (0.67, 1.05)        |
| Race, other vs white                             | 0.81 (0.52, 1.27)        | 0.79 (0.50, 1.25)        |
| Ethnicity, Hispanic vs non-Hispanic              | 1.47 (0.90, 2.40)        | 1.31 (0.80, 2.15)        |
| Insurance, Medicare/Medicaid vs Medicare only    | 1.09 (0.86, 1.38)        | 1.05 (0.82, 1.34)        |
| Insurance, Medicaid only vs Medicare only        | 1.06 (0.68, 1.65)        | 1.06 (0.68, 1.67)        |
| Insurance, Other vs Medicare only                | 1.07 (0.83, 1.37)        | 1.02 (0.79, 1.32)        |
| Marital status, married vs single                | 1.02 (0.78, 1.33)        | 1.02 (0.78, 1.33)        |
| Marital status, divorced/separated vs single     | 0.91 (0.70, 1.19)        | 0.95 (0.72, 1.25)        |
| Marital status, widowed vs single                | 1.39 (0.95, 2.04)        | 1.39 (0.94, 2.05)        |
| Education level, grade school vs college or more | 1.26 (0.85, 1.88)        | 1.13 (0.75, 1.70)        |
| Education level, high school vs college or more  | 1.13 (0.92, 1.38)        | 1.10 (0.89, 1.35)        |
| English speaker                                  | 0.90 (0.38, 2.10)        | 0.96 (0.42, 2.20)        |
| Hospitalization                                  |                          | 0.92 (0.67, 1.27)        |
| Active on transplant waitlist                    |                          | 0.95 (0.72, 1.25)        |
| BMI, per 2 kg/m <sup>2</sup>                     |                          | 1.01 (0.99, 1.04)        |
| Cause ESRD, diabetes vs. other                   |                          | 0.99 (0.79, 1.25)        |
| Cause ESRD, hypertension vs. other               |                          | 1.00 (0.78, 1.28)        |
| Vascular access, catheter vs. fistula            |                          | 0.93 (0.71, 1.23)        |
| Vascular access, graft vs. fistula               |                          | 1.15 (0.90, 1.46)        |
| Hemoglobin, per 0.5 g/dL                         |                          | 0.96 (0.93, 1.00)        |
| Albumin, per 0.2 g/dL                            |                          | <b>0.94 (0.90, 1.00)</b> |
| Kt/V, per 0.2                                    |                          | <b>1.09 (1.01, 1.17)</b> |
| ESRD vintage, per 12 months                      |                          | 0.97 (0.94, 1.01)        |
| ESRD vintage > 12 months before current facility |                          | 1.08 (0.84, 1.40)        |
| Unexcused absences                               |                          | 0.89 (0.69, 1.14)        |
| Treatments shortened                             |                          | <b>0.74 (0.62, 0.90)</b> |
| Telephone administration vs mail                 |                          | <b>2.00 (1.51, 2.64)</b> |

Data shown as odds ratio (OR) (95% CI). Odds ratio above 1.00 is associated with top box response. Associations with p<0.01 are in bold. ESRD: End stage renal disease; BMI: Body mass index; ADL: Activities of daily living; Kt/V: Measure of dialysis adequacy. Unexcused absence was defined as missing an entire HD treatment without rescheduling; shortened treatment was defined as treatments that were at least 15 minutes shorter than prescribed; hospitalization included hospital stays for any reason.

Table 4d: Multivariable association of characteristics with higher Nephrologists' Communication and Caring (NCC) score with multiple imputation

|                                                  | Model 1                  | Model 2                  |
|--------------------------------------------------|--------------------------|--------------------------|
| Age, per 5 years                                 | 1.01 (0.98, 1.04)        | 1.01 (0.98, 1.04)        |
| Female                                           | <b>1.18 (1.03, 1.36)</b> | 1.13 (0.97, 1.31)        |
| Race, black vs white                             | 1.09 (0.93, 1.28)        | 1.13 (0.96, 1.33)        |
| Race, other vs white                             | 0.82 (0.58, 1.16)        | 0.79 (0.56, 1.14)        |
| Ethnicity, Hispanic vs non-Hispanic              | 1.07 (0.76, 1.51)        | 1.01 (0.71, 1.44)        |
| Insurance, Medicare/Medicaid vs Medicare only    | 1.06 (0.89, 1.27)        | 1.10 (0.91, 1.32)        |
| Insurance, Medicaid only vs Medicare only        | 0.95 (0.66, 1.36)        | 1.00 (0.69, 1.44)        |
| Insurance, Other vs Medicare only                | 1.04 (0.87, 1.24)        | 1.05 (0.88, 1.26)        |
| Marital status, married vs single                | 1.18 (0.96, 1.45)        | 1.18 (0.96, 1.45)        |
| Marital status, divorced/separated vs single     | 1.08 (0.87, 1.34)        | 1.11 (0.89, 1.37)        |
| Marital status, widowed vs single                | 1.06 (0.81, 1.38)        | 1.05 (0.80, 1.38)        |
| Education level, grade school vs college or more | 1.12 (0.85, 1.47)        | 1.12 (0.85, 1.49)        |
| Education level, high school vs college or more  | 1.06 (0.91, 1.23)        | 1.07 (0.92, 1.25)        |
| English speaker                                  | 1.35 (0.76, 2.38)        | 1.39 (0.78, 2.49)        |
| Hospitalization                                  |                          | 1.06 (0.84, 1.34)        |
| Active on transplant waitlist                    |                          | <b>1.29 (1.05, 1.58)</b> |
| BMI, per 2 kg/m <sup>2</sup>                     |                          | 1.00 (0.98, 1.02)        |
| Cause ESRD, diabetes vs. other                   |                          | 0.92 (0.77, 1.09)        |
| Cause ESRD, hypertension vs. other               |                          | 0.95 (0.79, 1.14)        |
| Vascular access, catheter vs. fistula            |                          | 0.93 (0.76, 1.14)        |
| Vascular access, graft vs. fistula               |                          | 0.90 (0.76, 1.08)        |
| Hemoglobin, per 0.5 g/dL                         |                          | 0.99 (0.96, 1.02)        |
| Albumin, per 0.2 g/dL                            |                          | 1.01 (0.97, 1.05)        |
| Kt/V, per 0.2                                    |                          | <b>1.08 (1.02, 1.14)</b> |
| ESRD vintage, per 12 months                      |                          | 1.00 (0.97, 1.03)        |
| ESRD vintage > 12 months before current facility |                          | 1.10 (0.91, 1.33)        |
| Unexcused absences                               |                          | 0.90 (0.73, 1.10)        |
| Treatments shortened                             |                          | <b>0.77 (0.67, 0.89)</b> |
| Telephone administration vs mail                 |                          | 1.16 (0.97, 1.40)        |

Data shown as odds ratio (OR) (95% CI). Odds ratio above 1.00 is associated with top box response. Associations with p<0.01 are in bold. ESRD: End stage renal disease; BMI: Body mass index; ADL: Activities of daily living; Kt/V: Measure of dialysis adequacy. Unexcused absence was defined as missing an entire HD treatment without rescheduling; shortened treatment was defined as treatments that were at least 15 minutes shorter than prescribed; hospitalization included hospital stays for any reason.

Table 4e: Multivariable association of characteristics with higher Quality of Dialysis Center Care and Operations (DCO) score with multiple imputation

|                                                  | Model 1                  | Model 2                  |
|--------------------------------------------------|--------------------------|--------------------------|
| Age, per 5 years                                 | <b>1.08 (1.03, 1.12)</b> | 1.04 (0.99, 1.09)        |
| Female                                           | 0.86 (0.71, 1.04)        | 0.86 (0.70, 1.06)        |
| Race, black vs white                             | 0.88 (0.71, 1.09)        | 0.90 (0.71, 1.13)        |
| Race, other vs white                             | 0.66 (0.40, 1.11)        | 0.70 (0.42, 1.18)        |
| Ethnicity, Hispanic vs non-Hispanic              | 1.33 (0.86, 2.05)        | 1.10 (0.70, 1.73)        |
| Insurance, Medicare/Medicaid vs Medicare only    | 1.13 (0.88, 1.45)        | 1.10 (0.85, 1.42)        |
| Insurance, Medicaid only vs Medicare only        | 1.17 (0.71, 1.91)        | 1.13 (0.68, 1.88)        |
| Insurance, Other vs Medicare only                | 1.20 (0.95, 1.52)        | 1.12 (0.88, 1.43)        |
| Marital status, married vs single                | 1.12 (0.84, 1.49)        | 1.22 (0.91, 1.64)        |
| Marital status, divorced/separated vs single     | 1.02 (0.75, 1.38)        | 1.12 (0.82, 1.52)        |
| Marital status, widowed vs single                | 1.08 (0.75, 1.56)        | 1.13 (0.78, 1.63)        |
| Education level, grade school vs college or more | <b>1.81 (1.26, 2.59)</b> | <b>1.64 (1.13, 2.38)</b> |
| Education level, high school vs college or more  | <b>1.50 (1.20, 1.86)</b> | <b>1.46 (1.17, 1.82)</b> |
| English speaker                                  | 1.34 (0.60, 2.97)        | 1.50 (0.65, 3.48)        |
| Hospitalization                                  |                          | 0.78 (0.56, 1.09)        |
| Active on transplant waitlist                    |                          | 0.74 (0.54, 1.00)        |
| BMI, per 2 kg/m <sup>2</sup>                     |                          | 0.97 (0.95, 1.00)        |
| Cause ESRD, diabetes vs. other                   |                          | 0.97 (0.77, 1.22)        |
| Cause ESRD, hypertension vs. other               |                          | 1.01 (0.78, 1.29)        |
| Vascular access, catheter vs. fistula            |                          | <b>1.43 (1.10, 1.85)</b> |
| Vascular access, graft vs. fistula               |                          | 0.96 (0.75, 1.22)        |
| Hemoglobin, per 0.5 g/dL                         |                          | 0.99 (0.94, 1.03)        |
| Albumin, per 0.2 g/dL                            |                          | 1.02 (0.97, 1.08)        |
| Kt/V, per 0.2                                    |                          | 1.05 (0.97, 1.13)        |
| ESRD vintage, per 12 months                      |                          | <b>0.96 (0.92, 0.99)</b> |
| ESRD vintage > 12 months before current facility |                          | 0.76 (0.57, 1.01)        |
| Unexcused absences                               |                          | <b>0.67 (0.50, 0.91)</b> |
| Treatments shortened                             |                          | 0.86 (0.71, 1.05)        |
| Telephone administration vs mail                 |                          | <b>1.93 (1.53, 2.43)</b> |

Data shown as odds ratio (OR) (95% CI). Odds ratio above 1.00 is associated with top box response. Associations with p<0.01 are in bold. ESRD: End stage renal disease; BMI: Body mass index; ADL: Activities of daily living; Kt/V: Measure of dialysis adequacy. Unexcused absence was defined as missing an entire HD treatment without rescheduling; shortened treatment was defined as treatments that were at least 15 minutes shorter than prescribed; hospitalization included hospital stays for any reason.

Table 4f: Multivariable association of characteristics with higher Providing Information to Patients (PIP) score with multiple imputation

|                                                  | Model 1                  | Model 2                  |
|--------------------------------------------------|--------------------------|--------------------------|
| Age, per 5 years                                 | <b>0.86 (0.84, 0.89)</b> | <b>0.87 (0.84, 0.90)</b> |
| Female                                           | 0.96 (0.83, 1.11)        | 1.00 (0.85, 1.17)        |
| Race, black vs white                             | 0.90 (0.76, 1.06)        | 0.85 (0.72, 1.02)        |
| Race, other vs white                             | 1.20 (0.84, 1.70)        | 1.23 (0.86, 1.76)        |
| Ethnicity, Hispanic vs non-Hispanic              | 0.85 (0.60, 1.22)        | 0.79 (0.55, 1.14)        |
| Insurance, Medicare/Medicaid vs Medicare only    | 0.95 (0.79, 1.15)        | 0.97 (0.80, 1.18)        |
| Insurance, Medicaid only vs Medicare only        | 0.80 (0.55, 1.17)        | 0.85 (0.58, 1.24)        |
| Insurance, Other vs Medicare only                | 0.92 (0.76, 1.12)        | 0.89 (0.73, 1.08)        |
| Marital status, married vs single                | <b>1.30 (1.05, 1.60)</b> | <b>1.29 (1.04, 1.60)</b> |
| Marital status, divorced/separated vs single     | 1.03 (0.82, 1.29)        | 1.04 (0.83, 1.31)        |
| Marital status, widowed vs single                | 1.33 (1.00, 1.77)        | 1.33 (1.00, 1.78)        |
| Education level, grade school vs college or more | 1.14 (0.85, 1.53)        | 1.09 (0.81, 1.47)        |
| Education level, high school vs college or more  | 1.08 (0.92, 1.26)        | 1.07 (0.91, 1.25)        |
| English speaker                                  | 1.20 (0.71, 2.02)        | 1.25 (0.74, 2.11)        |
| Hospitalization                                  |                          | 1.02 (0.80, 1.31)        |
| Active on transplant waitlist                    |                          | <b>1.38 (1.10, 1.72)</b> |
| BMI, per 2 kg/m <sup>2</sup>                     |                          | 1.01 (0.99, 1.03)        |
| Cause ESRD, diabetes vs. other                   |                          | 1.09 (0.91, 1.31)        |
| Cause ESRD, hypertension vs. other               |                          | 1.13 (0.93, 1.38)        |
| Vascular access, catheter vs. fistula            |                          | 1.03 (0.83, 1.28)        |
| Vascular access, graft vs. fistula               |                          | 1.16 (0.96, 1.39)        |
| Hemoglobin, per 0.5 g/dL                         |                          | 1.00 (0.96, 1.03)        |
| Albumin, per 0.2 g/dL                            |                          | 1.04 (1.00, 1.09)        |
| Kt/V, per 0.2                                    |                          | 0.96 (0.90, 1.01)        |
| ESRD vintage, per 12 months                      |                          | 0.99 (0.96, 1.02)        |
| ESRD vintage > 12 months before current facility |                          | 0.87 (0.71, 1.07)        |
| Unexcused absences                               |                          | 0.84 (0.68, 1.04)        |
| Treatments shortened                             |                          | <b>0.84 (0.72, 0.98)</b> |
| Telephone administration vs mail                 |                          | <b>1.36 (1.13, 1.65)</b> |

Data shown as odds ratio (OR) (95% CI). Odds ratio above 1.00 is associated with top box response. Associations with p<0.01 are in bold. ESRD: End stage renal disease; BMI: Body mass index; ADL: Activities of daily living; Kt/V: Measure of dialysis adequacy. Unexcused absence was defined as missing an entire HD treatment without rescheduling; shortened treatment was defined as treatments that were at least 15 minutes shorter than prescribed; hospitalization included hospital stays for any reason.

Table 5a: Multivariable association of characteristics with higher nephrologist rating using older top box definition\*

|                                                  | Model 1                  | Model 2                  |
|--------------------------------------------------|--------------------------|--------------------------|
| ICC                                              | 0.06                     | 0.06                     |
| Age, per 5 years                                 | <b>1.07 (1.03, 1.10)</b> | <b>1.06 (1.02, 1.10)</b> |
| Female                                           | <b>1.26 (1.08, 1.46)</b> | <b>1.21 (1.02, 1.43)</b> |
| Race, black vs white                             | 1.18 (0.99, 1.41)        | <b>1.21 (1.01, 1.46)</b> |
| Race, other vs white                             | 0.80 (0.54, 1.16)        | 0.79 (0.54, 1.16)        |
| Ethnicity, Hispanic vs non-Hispanic              | 1.05 (0.71, 1.55)        | 1.03 (0.69, 1.54)        |
| Insurance, Medicare/Medicaid vs Medicare only    | 1.03 (0.85, 1.26)        | 1.09 (0.89, 1.33)        |
| Insurance, Medicaid only vs Medicare only        | 0.91 (0.62, 1.34)        | 0.99 (0.67, 1.46)        |
| Insurance, Other vs Medicare only                | 1.06 (0.87, 1.28)        | 1.07 (0.88, 1.31)        |
| Marital status, married vs single                | 1.10 (0.88, 1.37)        | 1.11 (0.89, 1.38)        |
| Marital status, divorced/separated vs single     | 1.00 (0.80, 1.26)        | 1.06 (0.84, 1.33)        |
| Marital status, widowed vs single                | 1.14 (0.85, 1.54)        | 1.17 (0.87, 1.58)        |
| Education level, grade school vs college or more | 1.35 (0.99, 1.85)        | 1.35 (0.98, 1.86)        |
| Education level, high school vs college or more  | <b>1.19 (1.01, 1.40)</b> | <b>1.19 (1.01, 1.41)</b> |
| English speaker                                  | <b>0.43 (0.18, 0.98)</b> | 0.48 (0.21, 1.11)        |
| Hospitalization                                  |                          | 0.93 (0.73, 1.20)        |
| Active on transplant waitlist                    |                          | 1.25 (0.99, 1.57)        |
| BMI, per 2 kg/m <sup>2</sup>                     |                          | 1.01 (0.99, 1.03)        |
| Cause ESRD, diabetes vs. other                   |                          | 0.85 (0.71, 1.03)        |
| Cause ESRD, hypertension vs. other               |                          | 1.02 (0.83, 1.25)        |
| Vascular access, catheter vs. fistula            |                          | 0.88 (0.70, 1.10)        |
| Vascular access, graft vs. fistula               |                          | 0.97 (0.80, 1.18)        |
| Hemoglobin, per 0.5 g/dL                         |                          | 0.98 (0.95, 1.01)        |
| Albumin, per 0.2 g/dL                            |                          | 0.99 (0.95, 1.04)        |
| Kt/V, per 0.2                                    |                          | 1.06 (0.99, 1.13)        |
| ESRD vintage, per 12 months                      |                          | 0.99 (0.97, 1.02)        |
| ESRD vintage > 12 months before current facility |                          | 0.95 (0.77, 1.18)        |
| Unexcused absences                               |                          | <b>0.77 (0.62, 0.96)</b> |
| Treatments shortened                             |                          | <b>0.71 (0.61, 0.83)</b> |
| Telephone administration vs mail                 |                          | 1.20 (0.97, 1.47)        |

\*Prior to 2014 top box referred to 8-10 rating instead of 9-10. Data shown as odds ratio (OR) (95% CI). Odds ratio above 1.00 is associated with top box response. Associations with p<0.01 are in bold. ESRD: End stage renal disease; BMI: Body mass index; ADL: Activities of daily living; Kt/V: Measure of dialysis adequacy. Unexcused absence was defined as missing an entire HD treatment without rescheduling; shortened treatment was defined as treatments that were at least 15 minutes shorter than prescribed; hospitalization included hospital stays for any reason.



Table 5b: Multivariable association of characteristics with higher dialysis staff rating using older top box definition\*

|                                                  | Model 1                  | Model 2                  |
|--------------------------------------------------|--------------------------|--------------------------|
| ICC                                              | 0.08                     | 0.08                     |
| Age, per 5 years                                 | <b>1.07 (1.04, 1.11)</b> | <b>1.06 (1.03, 1.10)</b> |
| Female                                           | 0.99 (0.84, 1.16)        | 0.95 (0.80, 1.13)        |
| Race, black vs white                             | 0.95 (0.79, 1.14)        | 0.92 (0.76, 1.12)        |
| Race, other vs white                             | 0.92 (0.62, 1.37)        | 0.92 (0.61, 1.37)        |
| Ethnicity, Hispanic vs non-Hispanic              | 0.87 (0.58, 1.30)        | 0.82 (0.54, 1.23)        |
| Insurance, Medicare/Medicaid vs Medicare only    | 0.96 (0.78, 1.19)        | 0.96 (0.78, 1.18)        |
| Insurance, Medicaid only vs Medicare only        | 1.50 (0.99, 2.27)        | <b>1.54 (1.02, 2.34)</b> |
| Insurance, Other vs Medicare only                | 1.02 (0.83, 1.25)        | 1.00 (0.81, 1.23)        |
| Marital status, married vs single                | 1.07 (0.85, 1.34)        | 1.06 (0.84, 1.33)        |
| Marital status, divorced/separated vs single     | 1.00 (0.79, 1.27)        | 1.02 (0.80, 1.30)        |
| Marital status, widowed vs single                | 1.21 (0.88, 1.65)        | 1.21 (0.88, 1.66)        |
| Education level, grade school vs college or more | <b>1.72 (1.23, 2.41)</b> | <b>1.61 (1.15, 2.27)</b> |
| Education level, high school vs college or more  | <b>1.45 (1.22, 1.72)</b> | <b>1.42 (1.19, 1.70)</b> |
| English speaker                                  | 1.02 (0.48, 2.15)        | 1.14 (0.54, 2.41)        |
| Hospitalization                                  |                          | 1.03 (0.79, 1.35)        |
| Active on transplant waitlist                    |                          | 1.03 (0.81, 1.31)        |
| BMI, per 2 kg/m <sup>2</sup>                     |                          | 1.01 (0.99, 1.04)        |
| Cause ESRD, diabetes vs. other                   |                          | 1.05 (0.86, 1.27)        |
| Cause ESRD, hypertension vs. other               |                          | 1.05 (0.85, 1.29)        |
| Vascular access, catheter vs. fistula            |                          | 0.84 (0.66, 1.06)        |
| Vascular access, graft vs. fistula               |                          | <b>1.24 (1.01, 1.53)</b> |
| Hemoglobin, per 0.5 g/dL                         |                          | 1.00 (0.97, 1.04)        |
| Albumin, per 0.2 g/dL                            |                          | 1.01 (0.96, 1.06)        |
| Kt/V, per 0.2                                    |                          | 1.05 (0.98, 1.12)        |
| ESRD vintage, per 12 months                      |                          | 0.98 (0.95, 1.01)        |
| ESRD vintage > 12 months before current facility |                          | 0.90 (0.72, 1.13)        |
| Unexcused absences                               |                          | 0.96 (0.76, 1.20)        |
| Treatments shortened                             |                          | <b>0.81 (0.69, 0.96)</b> |
| Telephone administration vs mail                 |                          | <b>1.33 (1.07, 1.65)</b> |

\*Prior to 2014 top box referred to 8-10 rating instead of 9-10. Data shown as odds ratio (OR) (95% CI). Odds ratio above 1.00 is associated with top box response. Associations with p<0.01 are in bold. ESRD: End stage renal disease; BMI: Body mass index; ADL: Activities of daily living; Kt/V: Measure of dialysis adequacy. Unexcused absence was defined as missing an entire HD treatment without rescheduling; shortened treatment was defined as treatments that were at least 15 minutes shorter than prescribed; hospitalization included hospital stays for any reason.

Table 5c: Multivariable association of characteristics with higher dialysis facility rating using older top box definition\*

|                                                  | Model 1                  | Model 2                  |
|--------------------------------------------------|--------------------------|--------------------------|
| ICC                                              | 0.09                     | 0.08                     |
| Age, per 5 years                                 | <b>1.08 (1.04, 1.12)</b> | <b>1.07 (1.03, 1.11)</b> |
| Female                                           | 0.97 (0.82, 1.14)        | 0.93 (0.78, 1.11)        |
| Race, black vs white                             | 1.04 (0.86, 1.27)        | 1.05 (0.86, 1.29)        |
| Race, other vs white                             | 1.03 (0.68, 1.57)        | 1.07 (0.70, 1.63)        |
| Ethnicity, Hispanic vs non-Hispanic              | 0.95 (0.63, 1.45)        | 0.88 (0.58, 1.35)        |
| Insurance, Medicare/Medicaid vs Medicare only    | 0.98 (0.79, 1.21)        | 0.97 (0.78, 1.21)        |
| Insurance, Medicaid only vs Medicare only        | 1.07 (0.71, 1.62)        | 1.09 (0.72, 1.66)        |
| Insurance, Other vs Medicare only                | 0.99 (0.80, 1.23)        | 0.94 (0.76, 1.16)        |
| Marital status, married vs single                | 1.15 (0.91, 1.44)        | 1.17 (0.92, 1.48)        |
| Marital status, divorced/separated vs single     | 1.10 (0.87, 1.41)        | 1.15 (0.90, 1.47)        |
| Marital status, widowed vs single                | 1.26 (0.92, 1.74)        | 1.30 (0.94, 1.80)        |
| Education level, grade school vs college or more | <b>1.99 (1.40, 2.83)</b> | <b>1.88 (1.31, 2.70)</b> |
| Education level, high school vs college or more  | <b>1.45 (1.21, 1.73)</b> | <b>1.43 (1.20, 1.71)</b> |
| English speaker                                  | <b>0.31 (0.11, 0.86)</b> | <b>0.35 (0.13, 0.98)</b> |
| Hospitalization                                  |                          | 0.90 (0.69, 1.19)        |
| Active on transplant waitlist                    |                          | 1.00 (0.79, 1.27)        |
| BMI, per 2 kg/m <sup>2</sup>                     |                          | 1.02 (0.99, 1.04)        |
| Cause ESRD, diabetes vs. other                   |                          | 0.99 (0.81, 1.21)        |
| Cause ESRD, hypertension vs. other               |                          | 0.97 (0.78, 1.20)        |
| Vascular access, catheter vs. fistula            |                          | 1.11 (0.87, 1.43)        |
| Vascular access, graft vs. fistula               |                          | 1.20 (0.97, 1.49)        |
| Hemoglobin, per 0.5 g/dL                         |                          | 1.00 (0.97, 1.04)        |
| Albumin, per 0.2 g/dL                            |                          | 1.00 (0.95, 1.05)        |
| Kt/V, per 0.2                                    |                          | 1.03 (0.96, 1.10)        |
| ESRD vintage, per 12 months                      |                          | 0.97 (0.94, 1.00)        |
| ESRD vintage > 12 months before current facility |                          | 0.91 (0.73, 1.14)        |
| Unexcused absences                               |                          | 0.88 (0.70, 1.11)        |
| Treatments shortened                             |                          | <b>0.81 (0.69, 0.96)</b> |
| Telephone administration vs mail                 |                          | <b>1.45 (1.16, 1.81)</b> |

\*Prior to 2014 top box referred to 8-10 rating instead of 9-10. Data shown as odds ratio (OR) (95% CI). Odds ratio above 1.00 is associated with top box response. Associations with p<0.01 are in bold. ESRD: End stage renal disease; BMI: Body mass index; ADL: Activities of daily living; Kt/V: Measure of dialysis adequacy. Unexcused absence was defined as missing an entire HD treatment without rescheduling; shortened treatment was defined as treatments that were at least 15 minutes shorter than prescribed; hospitalization included hospital stays for any reason.

Table 6: Multivariable association of characteristics with higher scores after excluding patients who responded by phone

|                                                  | Nephrologist Rating (N=3294) | Staff Rating (N=3145)    | Dialysis Facility Rating (N=3153) | NCC Score (N=3357)       | DCO Score (N=3238)       | PIP Score (N=3185)       |
|--------------------------------------------------|------------------------------|--------------------------|-----------------------------------|--------------------------|--------------------------|--------------------------|
| ICC                                              | 0.06                         | 0.09                     | 0.08                              | 0.03                     | 0.06                     | 0.04                     |
| Age, per 5 years                                 | <b>1.08 (1.03, 1.13)</b>     | <b>1.10 (1.04, 1.15)</b> | <b>1.11 (1.05, 1.17)</b>          | 1.03 (0.99, 1.07)        | 1.05 (0.99, 1.11)        | <b>0.86 (0.82, 0.89)</b> |
| Female                                           | 1.07 (0.87, 1.32)            | 0.84 (0.66, 1.06)        | 0.81 (0.64, 1.02)                 | <b>1.24 (1.04, 1.48)</b> | 0.88 (0.68, 1.14)        | 1.06 (0.87, 1.28)        |
| Race, black vs white                             | 1.04 (0.83, 1.30)            | 0.91 (0.70, 1.17)        | 0.87 (0.68, 1.13)                 | 1.10 (0.91, 1.34)        | 0.79 (0.59, 1.05)        | <b>0.78 (0.64, 0.97)</b> |
| Race, other vs white                             | 0.73 (0.46, 1.16)            | 0.95 (0.55, 1.64)        | 0.96 (0.55, 1.67)                 | 0.80 (0.52, 1.24)        | <b>0.45 (0.21, 0.94)</b> | 1.39 (0.89, 2.17)        |
| Ethnicity, Hispanic vs non-Hispanic              | 1.32 (0.77, 2.24)            | 0.80 (0.45, 1.42)        | 1.03 (0.57, 1.87)                 | 0.88 (0.55, 1.41)        | 1.46 (0.79, 2.71)        | <b>0.53 (0.31, 0.89)</b> |
| Insurance, Medicare/Medicaid vs Medicare only    | 0.96 (0.74, 1.24)            | 0.90 (0.68, 1.19)        | 1.02 (0.77, 1.35)                 | 1.04 (0.84, 1.29)        | 1.18 (0.85, 1.64)        | 0.83 (0.65, 1.04)        |
| Insurance, Medicaid only vs Medicare only        | 0.95 (0.59, 1.54)            | 1.49 (0.84, 2.62)        | 1.04 (0.61, 1.75)                 | 0.83 (0.53, 1.29)        | 1.18 (0.62, 2.25)        | 0.66 (0.42, 1.06)        |
| Insurance, Other vs Medicare only                | 0.90 (0.70, 1.15)            | 0.93 (0.69, 1.24)        | 0.92 (0.69, 1.22)                 | 0.99 (0.80, 1.22)        | 1.05 (0.79, 1.40)        | 0.86 (0.68, 1.08)        |
| Marital status, married vs single                | 0.93 (0.70, 1.23)            | 1.09 (0.80, 1.48)        | 1.06 (0.78, 1.44)                 | 1.12 (0.87, 1.43)        | 1.22 (0.85, 1.76)        | 1.12 (0.87, 1.45)        |
| Marital status, divorced/separated vs single     | 0.87 (0.65, 1.16)            | 0.87 (0.63, 1.18)        | 0.87 (0.63, 1.18)                 | 1.06 (0.82, 1.37)        | 1.03 (0.70, 1.53)        | 0.83 (0.63, 1.09)        |
| Marital status, widowed vs single                | 1.04 (0.71, 1.52)            | 1.34 (0.86, 2.07)        | 1.41 (0.90, 2.20)                 | 0.89 (0.64, 1.22)        | 1.05 (0.66, 1.68)        | 1.22 (0.87, 1.73)        |
| Education level, grade school vs college or more | 1.32 (0.84, 2.08)            | 1.45 (0.85, 2.48)        | 1.32 (0.79, 2.23)                 | 1.21 (0.84, 1.74)        | <b>1.79 (1.10, 2.91)</b> | 1.21 (0.82, 1.80)        |
| Education level, high school vs college or more  | 1.05 (0.85, 1.29)            | 1.10 (0.87, 1.39)        | 1.09 (0.86, 1.38)                 | 1.09 (0.92, 1.30)        | <b>1.41 (1.09, 1.84)</b> | 1.05 (0.87, 1.28)        |
| Hospitalization                                  | 0.89 (0.64, 1.23)            | 1.06 (0.72, 1.55)        | 1.00 (0.68, 1.47)                 | 0.95 (0.71, 1.27)        | 0.67 (0.42, 1.06)        | 0.97 (0.71, 1.33)        |
| Active on transplant waitlist                    | 1.25 (0.94, 1.66)            | 1.03 (0.76, 1.40)        | 0.92 (0.68, 1.24)                 | 1.21 (0.95, 1.53)        | <b>0.67 (0.45, 0.99)</b> | <b>1.39 (1.08, 1.77)</b> |
| BMI, per 2 kg/m <sup>2</sup>                     | 1.02 (0.99, 1.02)            | 1.02 (0.99, 1.02)        | 1.02 (0.99, 1.02)                 | 1.00 (0.98, 1.00)        | 0.98 (0.94, 0.98)        | 1.01 (0.99, 1.01)        |

|                                                  |                          |                          |                          |                          |                          |                   |
|--------------------------------------------------|--------------------------|--------------------------|--------------------------|--------------------------|--------------------------|-------------------|
| Cause ESRD, diabetes vs. other                   | 0.85 (0.67, 1.08)        | 1.00 (0.77, 1.31)        | 0.97 (0.74, 1.27)        | 0.91 (0.75, 1.11)        | 0.96 (0.72, 1.28)        | 1.09 (0.88, 1.35) |
| Cause ESRD, hypertension vs. other               | 0.88 (0.68, 1.13)        | 0.98 (0.74, 1.30)        | 0.88 (0.66, 1.16)        | 0.93 (0.75, 1.15)        | 1.12 (0.83, 1.51)        | 1.23 (0.98, 1.55) |
| Vascular access, catheter vs. fistula            | 0.97 (0.73, 1.29)        | 0.82 (0.59, 1.13)        | 0.87 (0.63, 1.21)        | 0.92 (0.72, 1.17)        | 1.36 (0.98, 1.88)        | 1.03 (0.79, 1.35) |
| Vascular access, graft vs. fistula               | 1.02 (0.80, 1.30)        | 1.13 (0.85, 1.50)        | 1.27 (0.95, 1.68)        | 0.96 (0.78, 1.18)        | 1.00 (0.74, 1.35)        | 1.24 (1.00, 1.55) |
| Hemoglobin, per 0.5 g/dL                         | <b>0.95 (0.91, 0.99)</b> | 1.00 (0.95, 1.04)        | 0.99 (0.94, 1.04)        | 1.01 (0.97, 1.04)        | 0.98 (0.93, 1.04)        | 1.01 (0.97, 1.05) |
| Albumin, per 0.2 g/dL                            | 1.00 (0.94, 1.05)        | 0.96 (0.90, 1.02)        | 0.95 (0.89, 1.01)        | 1.02 (0.97, 1.07)        | 1.05 (0.98, 1.13)        | 1.03 (0.98, 1.08) |
| Kt/V, per 0.2                                    | 1.02 (0.94, 1.10)        | 1.04 (0.95, 1.13)        | 1.07 (0.98, 1.17)        | <b>1.09 (1.02, 1.16)</b> | 1.07 (0.97, 1.17)        | 0.94 (0.87, 1.01) |
| ESRD vintage, per 12 months                      | 1.01 (0.98, 1.05)        | 0.96 (0.92, 1.00)        | <b>0.96 (0.92, 1.00)</b> | 1.00 (0.97, 1.03)        | <b>0.94 (0.90, 0.99)</b> | 0.99 (0.95, 1.02) |
| ESRD vintage > 12 months before current facility | 0.87 (0.67, 1.13)        | 0.91 (0.68, 1.21)        | 1.00 (0.75, 1.34)        | 1.14 (0.91, 1.43)        | <b>0.68 (0.47, 0.99)</b> | 0.84 (0.66, 1.08) |
| Unexcused absences                               | 0.80 (0.62, 1.05)        | 0.95 (0.70, 1.28)        | 0.87 (0.65, 1.17)        | 0.99 (0.77, 1.27)        | 0.74 (0.50, 1.08)        | 0.90 (0.69, 1.16) |
| Treatments shortened                             | <b>0.70 (0.58, 0.85)</b> | <b>0.75 (0.60, 0.94)</b> | <b>0.72 (0.58, 0.90)</b> | <b>0.71 (0.60, 0.84)</b> | 0.99 (0.78, 1.27)        | 0.85 (0.71, 1.02) |

Data shown as odds ratio (OR) (95% CI) adjusted for all other variables in the table. Odds ratio above 1.00 is associated with top box response. Associations with p<0.01 are in bold. ESRD: End stage renal disease; BMI: Body mass index; ADL: Activities of daily living; Kt/V: Measure of dialysis adequacy. Unexcused absence was defined as missing an entire HD treatment without rescheduling; shortened treatment was defined as treatments that were at least 15 minutes shorter than prescribed; hospitalization included hospital stays for any reason.
